# Supplementary material for: Exploring the Activity Profile of TbrPDEB1 and hPDE4 Inhibitors Using Free Energy Perturbation
Source: PubMed Central journal article supplement (PMC9190044; doi:10.1021/acsmedchemlett.1c00690), 2022-05-23
Supplement: ml1c00690_si_001.pdf [file ml1c00690_si_001.pdf]

## SUPPORTING INFORMATION

### **Exploring the activity profile of TbrPDEB1 and hPDE4 inhibitors using Free Energy Perturbation (FEP+)**

Lorena Zara<sup>1</sup>, Francesca Moraca<sup>2</sup>, Jacqueline E. Van Muijlwijk-Koezen<sup>1</sup>, Barbara Zarzycka<sup>1</sup>, Robert Abel<sup>2</sup>, Iwan J.P. de Esch<sup>1\*</sup>

<sup>1</sup>Amsterdam Institute of Molecular and Life Sciences (AIMMS), Division of Medicinal Chemistry, Faculty of Science, Vrije Universiteit Amsterdam, De Boelelaan 1108, 1081 HZ Amsterdam, The Netherlands

<sup>2</sup>Schrodinger, Inc. 1540 Broadway, NY 10036, USA

## Table of content

|                                                                                                                                                                                                     |    |
|-----------------------------------------------------------------------------------------------------------------------------------------------------------------------------------------------------|----|
| Table of content.....                                                                                                                                                                               | 2  |
| Materials and methods .....                                                                                                                                                                         | 3  |
| Ligand Preparation.....                                                                                                                                                                             | 3  |
| Protein Structure Preparation.....                                                                                                                                                                  | 3  |
| Ligand docking .....                                                                                                                                                                                | 4  |
| FEP+ calculation.....                                                                                                                                                                               | 4  |
| Figure S1: Sequence alignment of human PDE4D, PDE4B, and parasite TbrPDEB1, colored by identity.....                                                                                                | 5  |
| Figure S2. Interaction fingerprints and 2D ligand graphs.....                                                                                                                                       | 6  |
| Table S1. Chemical structures of tetrahydrophthalazinones ligands of validation set 1, Glide SP score, $\Delta G$ values experimentally determined and respective $\Delta G$ computed by FEP+.....  | 10 |
| Table S2. Chemical structures of tetrahydrophthalazinones ligands of validation set 2, Glide SP score, $\Delta G$ values experimentally determined and respective $\Delta G$ computed by FEP+.....  | 11 |
| Table S3. Chemical structures of alkynamide phthalazinones ligands of validation set 3, Glide SP score, $\Delta G$ values experimentally determined and respective $\Delta G$ computed by FEP+..... | 12 |
| Table S4. Statistics on Data Sets used for FEP+ calculations.....                                                                                                                                   | 14 |
| <sup>a</sup> Thr841 included in the REST region .....                                                                                                                                               | 14 |
| Table S5. Flexibility and stability analysis of the X-ray structures in complex with PDEs inhibitors.....                                                                                           | 14 |
| Table S6. Convergence data from FEP+ calculation.....                                                                                                                                               | 15 |
| Figure S3: Examples of Good, Fair, and Bad convergence plots and the associated maps....                                                                                                            | 16 |
| References.....                                                                                                                                                                                     | 18 |

## Materials and methods

This work aims to validate the use of FEP+ to assess the activity profiles of multiple series of TbrPDEB1 inhibitors against the off-target hPDE4. The flexibility of the specific P-pocket in TbrPDEB1 constituted the challenge for FEP+ calculations. We considered it essential to analyze the degree of induced fit of the different ligand classes upon binding to address this issue.

### Ligand Preparation

Data sets were collected from an in-house database (SI Table 1, 2, and 3). All PDE inhibitors considered in this study were built using the Maestro 19 interface<sup>1</sup>; tautomer enumeration and protonation state assignment at experimental pH of 7.0 +/- 2 was performed using LigPrep<sup>2</sup>.

### Protein Structure Preparation

All protein structures were obtained from the Protein Data Bank (PDB) ([www.rcsb.org](http://www.rcsb.org)) and imported into Maestro. The tetrahydrophtalazinone series against TbrPDEB1 was investigated using the X-rays (PDB IDs: 5G57, 1.73 Å resolution, 5G2B, 1.83 Å resolution)<sup>3</sup> in complex with NPD-038 and NPD-008, respectively. No ligands belonging to the tetrahydrophtalazinone series have nowadays been co-crystallized with any hPDE4. Therefore hPDE4B (PDB ID: 5LAQ, 2.40 Å resolution) and hPDE4D (PDB ID: 5LBO, 2.25 Å resolution)<sup>3</sup> in complex with NPD-001 were investigated.

For the analysis of the alkynamide phtalazinone series TbrPDEB1 (PDB ID: 6GXQ, 1.96 Å resolution) and hPDE4D (PDB ID: 6HWO, 1.99 Å resolution),<sup>4</sup> in complex with NPD-1335, were selected.

The structures were prepared using the Protein Preparation Wizard<sup>5,6</sup> tool in Maestro. Hydrogen atoms were added, missing side chains were filled, all crystal waters were retained.

The proper ionization state was assigned for both the amino acids and co-crystallized ligand at physiological pH.

The stability of the co-crystallized ligands in their corresponding binding site was assessed by running 100 ns MD Desmond simulations<sup>7</sup>, (NPT ensemble (300 K, 1bar), SPC water, Langevin barostat), in each of the complexes under analysis (PDB IDs: 5G2B; 5G5V; 5L8Y; 5LAQ; 5LBO; 6HWO; 6GXQ; 6RFN; 6RFW).

### **Ligand docking**

The ligands reported in SI Tables 1, 2, and 3 were docked into the TbrPDEB1 and hPDE4 structures using Glide<sup>8,9</sup> core-constrained docking with default parameters, using the X-ray ligand as reference (with the standard precision scoring function).

We then refined the alignment into the binding site of both PDE models for the subsequent FEP+ calculation using the Flexible Ligand Alignment tool<sup>10</sup> with the maximum common substructure algorithm.

### **FEP+ calculation**

Free energy calculations were performed using the FEP+ method<sup>11</sup> with Schrödinger suite in the versions 2019-4 to 2020-1. Maps were generated with default settings (optimal topology).

The OPLS3e<sup>12,13</sup> force field with custom parameters was used to predict the relative energy of binding of the ligands. A detailed description of the implementation of the methodology can be found elsewhere<sup>14-16</sup>. The missing torsions parameters of the ligands were computed using the Force Field Builder<sup>17</sup> tool.

Maps were generated with default settings (optimal topology). FEP+ jobs were run for 10 ns sampling time per  $\lambda$ -window for a total of 12  $\lambda$ -windows. The output was analyzed with the FEP+ panel in Maestro. Replica exchange with solute Tempering (REST) was used as sampling method as reported in prior publications<sup>16,18</sup> (with the highest effective temperature of 1000 K for a typical perturbation with about 20 heavy atoms in the hot region)<sup>16</sup> The Bennett acceptance ratio method was used to calculate the free energy difference between neighboring  $\lambda$  windows. The simulations were performed at NPT ensemble (300 K, 1bar), using SPC water model.

Calculations were run on the GPU compute nodes with Dual Intel Xeon CPU E5-2620 v4 @2.10GHz (16 core total), and NVIDIA GeForce GTX1080 GPUs. For this study, we specifically ran the FEP+ simulations across 4 GPUs. The FEP+ calculation with the highest number of ligands in the map from Table 3 took almost 27 h to complete. It must be noted that the duration of FEP+ calculations is also dependent by the hardware used, the size of the system, the number of ligands, the number of lambda windows (default for the FEP+ implementation are as follows: 12 for neutral perturbations, 16 for core-hopping perturbations, and 24 for charge-hopping perturbations), and the length of the simulation.

**Figure S1: Sequence alignment of human PDE4D, PDE4B, and parasite TbrPDEB1, colored by identity.**

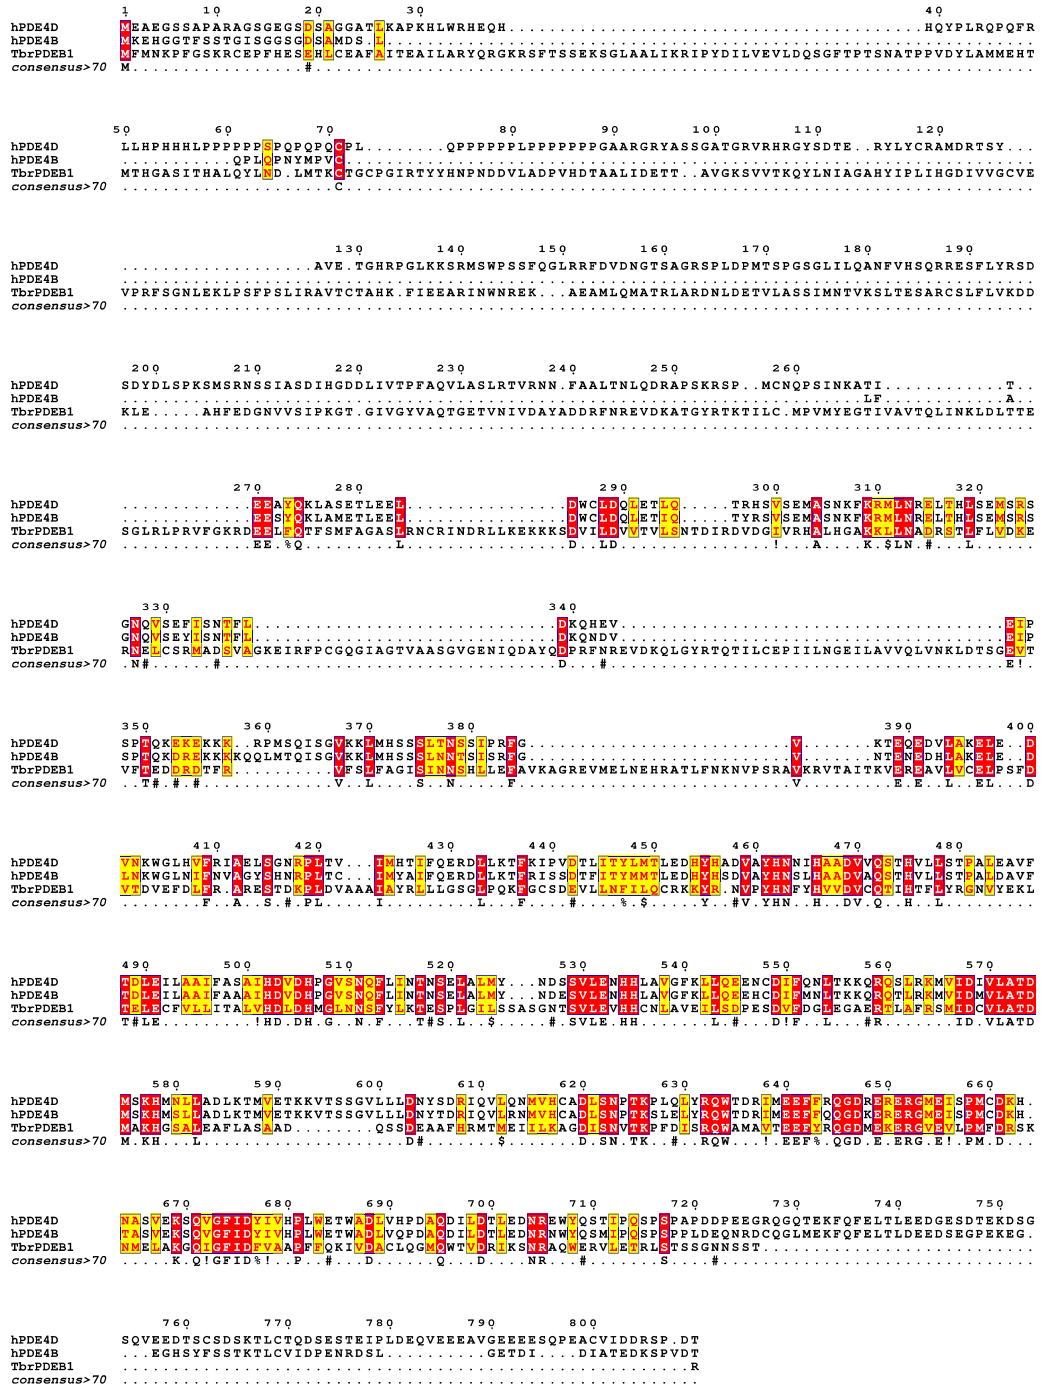



# 5G5V (TbrPDEB1)

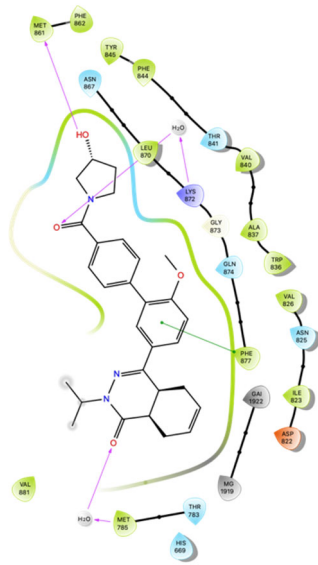

● Hydrophobic ● Aromatic face-to-face ● Aromatic face-to-edge ● H-bond donor ● H-bond receptor

| MB1        | MB         | HC1        |            |            | Q1         |            |            |            |            | Q2         | HC         | Q2         | S          | Q2         | S          |            |            |            |            |
|------------|------------|------------|------------|------------|------------|------------|------------|------------|------------|------------|------------|------------|------------|------------|------------|------------|------------|------------|------------|
| 21K<br>819 | 22D<br>822 | 23I<br>823 | 24S<br>824 | 25N<br>825 | 26V<br>826 | 27S<br>833 | 28R<br>834 | 29W<br>836 | 30A<br>837 | 31M<br>838 | 32V<br>840 | 33T<br>841 | 34E<br>843 | 35F<br>844 | 36Y<br>845 | 37Q<br>847 | 38L<br>859 | 39P<br>860 | 40M<br>861 |
|            | ●          | ●          |            | ●          |            |            |            |            | ●          |            | ●          | ●          |            | ●          | ●          |            |            |            | ●          |

  

| S          | Q2         |            |            |            |            |            |            |            | Q          | HC2        | HC         | Q1         | HC2        |            | Q1         | Met1       | Met2 |     |
|------------|------------|------------|------------|------------|------------|------------|------------|------------|------------|------------|------------|------------|------------|------------|------------|------------|------|-----|
| 41F<br>862 | 42K<br>866 | 43N<br>867 | 44M<br>868 | 45E<br>869 | 46L<br>870 | 47A<br>871 | 48K<br>872 | 49G<br>873 | 50Q<br>874 | 51G<br>876 | 52F<br>877 | 53I<br>878 | 54F<br>880 | 55V<br>881 | 56A<br>882 | 57W<br>911 | 58X  | 59X |
|            |            | ●          |            |            |            |            |            | ●          | ●          |            | ●          |            |            |            |            |            |      |     |

# 5G2B (TbrPDEB1)

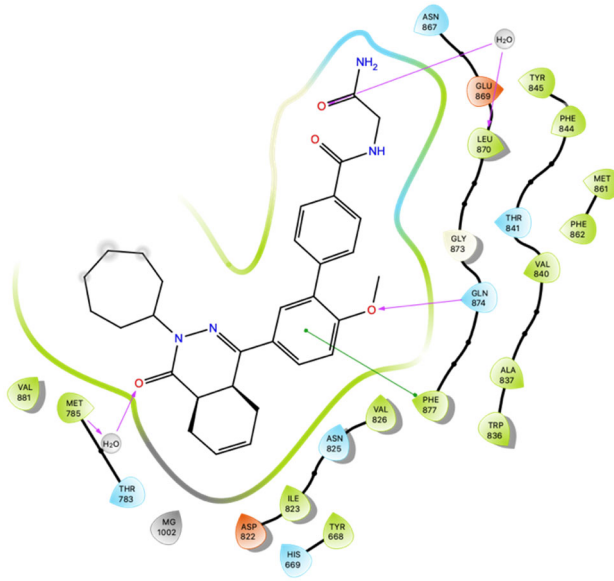

● Hydrophobic ● Aromatic face-to-face ● Aromatic face-to-edge ● H-bond donor ● H-bond receptor

| MB1        | MB         | HC1        |            |            | Q1         |            |            |            | Q2         | HC         | Q2         | S          | Q2         | S          |            |            |            |            |            |   |
|------------|------------|------------|------------|------------|------------|------------|------------|------------|------------|------------|------------|------------|------------|------------|------------|------------|------------|------------|------------|---|
| 21K<br>819 | 22D<br>822 | 23I<br>823 | 24S<br>824 | 25N<br>825 | 26V<br>826 | 27S<br>833 | 28R<br>834 | 29W<br>836 | 30A<br>837 | 31M<br>838 | 32V<br>840 | 33T<br>841 | 34E<br>843 | 35F<br>844 | 36Y<br>845 | 37Q<br>847 | 38L<br>859 | 39P<br>860 | 40M<br>861 |   |
|            | ●          | ●          |            | ●          |            |            |            |            | ●          |            | ●          |            |            | ●          | ●          |            |            |            |            | ● |

  

| S          | Q2         |            |            |            |            |            |            |            | Q          | HC2        | HC         | Q1         | HC2        |            | Q1         | Met1       | Met2 |     |
|------------|------------|------------|------------|------------|------------|------------|------------|------------|------------|------------|------------|------------|------------|------------|------------|------------|------|-----|
| 41F<br>862 | 42K<br>866 | 43N<br>867 | 44M<br>868 | 45E<br>869 | 46L<br>870 | 47A<br>871 | 48K<br>872 | 49G<br>873 | 50Q<br>874 | 51G<br>876 | 52F<br>877 | 53I<br>878 | 54F<br>880 | 55V<br>881 | 56A<br>882 | 57W<br>911 | 58X  | 59X |
|            |            | ●          |            |            |            |            |            | ●          | ●          |            | ●          |            |            | ●          |            |            |      |     |



## 5LAQ (hPDE4B)

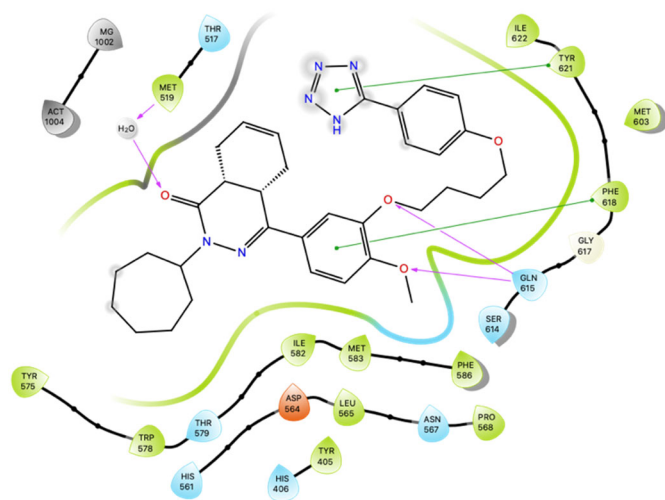

● Hydrophobic ● Aromatic face-to-face ● Aromatic face-to-edge ● H-bond donor ● H-bond receptor

| MB1        | MB         | HC1        |            |            | Q1         |            |            |            |            | Q2         | HC         | Q2         | S          |            | Q2         | S          |            |            |            |
|------------|------------|------------|------------|------------|------------|------------|------------|------------|------------|------------|------------|------------|------------|------------|------------|------------|------------|------------|------------|
| 21H<br>561 | 22D<br>564 | 23L<br>565 | 24S<br>566 | 25N<br>576 | 26P<br>568 | 27Y<br>575 | 28R<br>576 | 29W<br>578 | 30T<br>579 | 31D<br>580 | 32I<br>582 | 33M<br>583 | 34E<br>585 | 35F<br>586 | 36F<br>587 | 37Q<br>589 | 38S<br>601 | 39P<br>602 | 40M<br>603 |

| S          | Q2         |            |     |            |            |            |            |            | Q          | HC2        | HC         | Q1         | HC2        |            |            | Q1         | Met1 | Met2 |
|------------|------------|------------|-----|------------|------------|------------|------------|------------|------------|------------|------------|------------|------------|------------|------------|------------|------|------|
| 41C<br>604 | 42N<br>608 | 43A<br>609 | 44- | 45S<br>610 | 46V<br>611 | 47E<br>612 | 48K<br>613 | 49S<br>614 | 50Q<br>615 | 51G<br>617 | 52F<br>618 | 53I<br>619 | 54Y<br>621 | 55I<br>622 | 56V<br>623 | 57Y<br>652 | 58X  | 59X  |

**Table S1. Chemical structures of tetrahydrophthalazinones ligands of validation set 1, Glide SP score,  $\Delta G$  values experimentally determined and respective  $\Delta G$  computed by FEP+.**

| 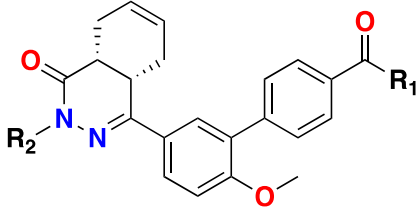 |                                                                                     |                                                                                     |                |                  |                 |                |                  |                 |
|------------------------------------------------------------------------------------|-------------------------------------------------------------------------------------|-------------------------------------------------------------------------------------|----------------|------------------|-----------------|----------------|------------------|-----------------|
| Ligand ID                                                                          | R <sub>1</sub>                                                                      | R <sub>2</sub>                                                                      | TbrPDEB1       |                  |                 | hPDE4          |                  |                 |
|                                                                                    |                                                                                     |                                                                                     | Glide SP score | Pred. $\Delta G$ | Exp. $\Delta G$ | Glide SP score | Pred. $\Delta G$ | Exp. $\Delta G$ |
| NPD-008                                                                            |    |    | -11.75         | -10.60           | -10.23          | -8.31          | -7.67            | -8.46           |
| NPD-0734                                                                           |    |    | -7.13          | -8.01            | -9.41           | -8.09          | -7.93            | -8.32           |
| NPD-0800                                                                           |  |  | -11.09         | -9.13            | -9.00           | -8.43          | -8.51            | -8.59           |
| NPD-0936                                                                           |  |  | -11.41         | -8.97            | -8.73           | -8.04          | -8.24            | -7.64           |
| NPD-0935                                                                           |  |  | -10.45         | -9.96            | -8.73           | -6.28          | -7.83            | -7.64           |
| NPD-0937                                                                           |  |  | -11.94         | -8.71            | -8.73           | -7.96          | -7.61            | -7.50           |
| NPD-0878                                                                           |  |  | -11.98         | -9.27            | -8.59           | -8.43          | -7.71            | -7.37           |
| NPD-0801                                                                           |  |  | -11.00         | -8.29            | -8.59           | -8.53          | -7.85            | -7.64           |
| NPD-0942                                                                           |  |  | -10.87         | -7.94            | -7.78           | -8.34          | -8.07            | -7.09           |

|         |  |  |        |       |       |       |      |       |
|---------|--|--|--------|-------|-------|-------|------|-------|
| NPD-039 |  |  | -10.90 | -8.48 | -9.55 | -5.09 | 6.46 | -7.78 |
|---------|--|--|--------|-------|-------|-------|------|-------|

**Table S2. Chemical structures of tetrahydrophthalazinones ligands of validation set 2, Glide SP score,  $\Delta G$  values experimentally determined and respective  $\Delta G$  computed by FEP+.**

|           |                |                | TbrPDEB1       |                  |                 | hPDE4          |                  |                 |
|-----------|----------------|----------------|----------------|------------------|-----------------|----------------|------------------|-----------------|
| Ligand ID | R <sub>1</sub> | R <sub>2</sub> | Glide SP score | Pred. $\Delta G$ | Exp. $\Delta G$ | Glide SP score | Pred. $\Delta G$ | Exp. $\Delta G$ |
|           |                |                |                |                  |                 |                |                  |                 |
| NPD-0746  |                |                | -13.17         | -9.52            | -9.55           | -8.42          | -7.82            | -8.46           |
| NPD-038   |                |                | -12.61         | -7.32            | -9.14           | -7.91          | -6.92            | -7.50           |
| NPD-060   |                |                | -11.76         | -8.89            | -8.46           | -5.91          | -7.90            | -8.46           |
| NPD-0887  |                |                | -10.78         | -8.16            | -8.19           | -7.90          | -7.37            | -7.92           |
| NPD-062   |                |                | -10.29         | -8.12            | -7.50           | -8.07          | -7.99            | -7.50           |
| NPD-0802  |                |                | -10.06         | -10.19           | -9.00           | -6.58          | -7.77            | -7.50           |
| NPD-0885  |                |                | -9.68          | -8.09            | -8.46           | -6.19          | -7.29            | -6.82           |

**Table S3. Chemical structures of alkynamide phthalazinones ligands of validation set 3, Glide SP score,  $\Delta G$  values experimentally determined and respective  $\Delta G$  computed by FEP+.**

|           |                | TbrPDEB1       |                  |                 | hPDE4D         |                  |                 |
|-----------|----------------|----------------|------------------|-----------------|----------------|------------------|-----------------|
| Ligand ID | R <sub>1</sub> | Glide SP score | Pred. $\Delta G$ | Exp. $\Delta G$ | Glide SP score | Pred. $\Delta G$ | Exp. $\Delta G$ |
|           |                |                |                  |                 |                |                  |                 |
| NPD-1335  |                | -9.65          | -8.99            | -9.30           | -9.49          | -8.95            | -8.32           |
| NPD-0361  |                | -8.15          | -8.85            | -8.50           | -8.91          | -9.28            | -8.46           |
| NPD-1016  |                | -8.48          | -8.57            | -9.40           | -8.10          | -8.18            | -8.73           |
| NPD-1018  |                | -8.30          | -10.21           | -9.15           | -8.91          | -10.66           | -8.19           |
| NPD-1024  |                | -7.84          | -7.95            | -8.92           | -8.76          | -8.24            | -8.59           |
| NPD-1038  |                | -7.86          | -7.89            | -8.68           | -8.59          | -7.97            | -8.87           |
| NPD-1039  |                | -8.16          | -9.59            | -8.87           | -9.43          | -9.01            | -8.32           |
| NPD-1041  |                | -7.28          | -7.42            | -8.40           | -5.19          | -8.16            | -8.73           |
| NPD-1042  |                | -8.09          | -8.42            | -8.91           | -8.80          | -8.54            | -8.32           |
| NPD-1168  |                | -8.25          | -7.90            | -8.25           | -3.69          | -8.28            | -8.46           |

|           |                                                                                     |       |        |       |       |       |       |
|-----------|-------------------------------------------------------------------------------------|-------|--------|-------|-------|-------|-------|
| NPD-1169  | 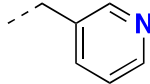   | -8.60 | -8.75  | -9.52 | -9.33 | -8.44 | -8.59 |
| NPD-1171  |    | -8.58 | -9.38  | -8.92 | -9.39 | -8.90 | -8.19 |
| NPD-1174  |    | -8.81 | -9.38  | -9.15 | -8.84 | -8.49 | -9.14 |
| NPD-1319  |    | -8.85 | -9.80  | -8.96 | -8.85 | -8.02 | -8.73 |
| NPD-1320  |    | -9.01 | -10.50 | -8.76 | -9.04 | -8.84 | -8.32 |
| NPD-1321  |    | -8.29 | -8.96  | -9.39 | -9.21 | -8.48 | -8.46 |
| NPD-1322  |   | -8.66 | -9.31  | -9.35 | -9.36 | -9.17 | -8.59 |
| NPD-1323  |  | -7.94 | -8.66  | -8.72 | -9.20 | -7.92 | -8.46 |
| NPD-1334  |  | -8.47 | -8.88  | -9.56 | -8.80 | -8.59 | -8.46 |
| NPD-3153  |  | -8.66 | -9.83  | -9.13 | -8.22 | -9.31 | -9.00 |
| NPD-3155  |  | -8.45 | -9.70  | -8.53 | -8.86 | -8.95 | -8.32 |
| NPD-1043a |  | -7.94 | -8.21  | -8.69 | -8.77 | -7.07 | -8.73 |
| NPD-1043b |  | -8.20 | -8.41  | -8.69 | -8.66 | -7.54 | -8.73 |

**Table S4. Statistics on Data Sets used for FEP+ calculations**

| Protein system  | PDB               | Ligand set | No. ligands | Expected Exp. R <sup>2</sup> | Expected FEP+ R <sup>2</sup> | Predicted R <sup>2</sup> | MUE (kcal/mol) | RMSE (kcal/mol) |
|-----------------|-------------------|------------|-------------|------------------------------|------------------------------|--------------------------|----------------|-----------------|
| <b>TbrPDEB1</b> | 5G2B              | 1          | 13          | 0.74± 0.1                    | 0.48±0.2                     | 0.63                     | 1.47± 0.3      | 2.05± 0.4       |
|                 | 5G2B <sup>a</sup> | 1          | 10          | 0.45± 0.2                    | 0.24±0.2                     | 0.25                     | 0.86± 0.1      | 1.03± 0.1       |
|                 | 5G2B              | 2          | 7           | 0.49± 0.2                    | 0.28±0.2                     | 0.37                     | 1.70± 0.2      | 1.86± 0.3       |
|                 | 5G5V              | 2          | 9           | 0.43± 0.2                    | 0.24±0.2                     | 0.37                     | 0.88± 0.1      | 1.03± 0.2       |
|                 | 6GXQ              | 3          | 23          | 0.17± 0.1                    | 0.08±0.1                     | 0.08                     | 0.89± 0.1      | 1.08± 0.1       |
| <b>hPDE4</b>    | 5LAQ              | 1          | 12          | 0.49± 0.2                    | 0.26±0.2                     | 0.45                     | 0.69± 0.1      | 0.90± 0.2       |
|                 | 5LAQ              | 2          | 7           | 0.49± 0.2                    | 0.28±0.2                     | 0.15                     | 0.76± 0.2      | 0.98± 0.3       |
|                 | 6HWO              | 3          | 23          | 0.10± 0.1                    | 0.06±0.1                     | 0.12                     | 0.82± 0.1      | 1.00± 0.1       |

<sup>a</sup>Thr841 included in the REST region

**Table S5. Flexibility and stability analysis of the X-ray structures in complex with PDEs inhibitors**

| Ligand ID       | Species  | PDB ID | RMSD Ligand <sup>a</sup> | RMSD FP <sup>b</sup> | RMSD PP <sup>c</sup> |
|-----------------|----------|--------|--------------------------|----------------------|----------------------|
|                 |          |        | Å                        | Å                    | Å                    |
| <b>NPD-008</b>  | TbrPDEB1 | 5G2B   | 1.8                      | 0.34                 | 3.53                 |
| <b>NPD-937</b>  | TbrPDEB1 | 5L8Y   | 3.5                      | 0.50                 | 1.49                 |
| <b>NPD-038</b>  | TbrPDEB1 | 5G5V   | 3.5                      | 0.70                 | 3.48                 |
| <b>NPD-001</b>  | hPDE4B   | 5LAQ   | 1.8                      | 0.62                 | 1.08                 |
|                 | hPDE4D   | 5LBO   | 2.4                      | 0.32                 | 0.67                 |
| <b>NPD-1335</b> | hPDE4D   | 6HWO   | /                        | 0.27                 | 0.78                 |
|                 | TbrPDEB1 | 6GXQ   | /                        | 0.26                 | 0.89                 |

<sup>a</sup> RMSD of the ligands measured during the MD simulation. <sup>b</sup> RMSD of on the protein backbone between various apo-forms (PDB IDs: 4I15, 4WZI and 3SL3 for TbrPDEB1, hPDE4B and hPDE4D, respectively) and holo-forms (PDB IDs: 5G2B; 5G57; 6GXQ for TbrPDEB1; PDB IDs: 5LAQ for hPDE4B; PDB IDs: 5LBO; 6HWO for hPDE4D) measured on the full protein (FP) and <sup>c</sup> on the P-pocket region (PP).

**Table S6. Convergence data from FEP+ calculation**

Convergence criteria fully integrated in the graphical interface of the FEP+ implementation are programmatically assessed and sorted in 3 categories: Good convergence rate:  $< 0.3 \text{ kcal mol}^{-1} \text{ ns}^{-1}$ ; Fair convergence rate:  $0.3 \text{ kcal mol}^{-1} \text{ ns}^{-1}$ ; Bad convergence rate:  $> 0.3 \text{ kcal mol}^{-1} \text{ ns}^{-1}$ . Below are reported the number of edges and the associated convergence categories of FEP+ perturbations calculated for set 1, 2 and 3.

| Species         | Lig. Set | PDB                      | N. Total Edges | N. Edges with Good Convergence rate | N. Edges with Fair Convergence rate | N. Edges with Bad Convergence rate |
|-----------------|----------|--------------------------|----------------|-------------------------------------|-------------------------------------|------------------------------------|
| <b>TbrPDEB1</b> | Set1     | 5G2B                     | 16             | 0                                   | 14                                  | 2                                  |
|                 | Set1     | 5G2B (REST) <sup>a</sup> | 17             | 17                                  | 0                                   | 0                                  |
|                 | Set2     | 5G2B                     | 10             | 10                                  | 0                                   | 0                                  |
|                 | Set2     | 5G5V                     | 9              | 8                                   | 1                                   | 0                                  |
|                 | Set3     | 6GXQ                     | 34             | 30                                  | 4                                   | 0                                  |
| <b>hPDE4</b>    | Set1     | 5LAQ                     | 18             | 15                                  | 3                                   | 0                                  |
|                 | Set2     | 5LAQ                     | 12             | 12                                  | 0                                   | 0                                  |
|                 | Set3     | 6HWO                     | 35             | 33                                  | 2                                   | 0                                  |

<sup>a</sup> Thr841 included in the REST region.

**Figure S3: Examples of Good, Fair, and Bad convergence plots and the associated maps.**

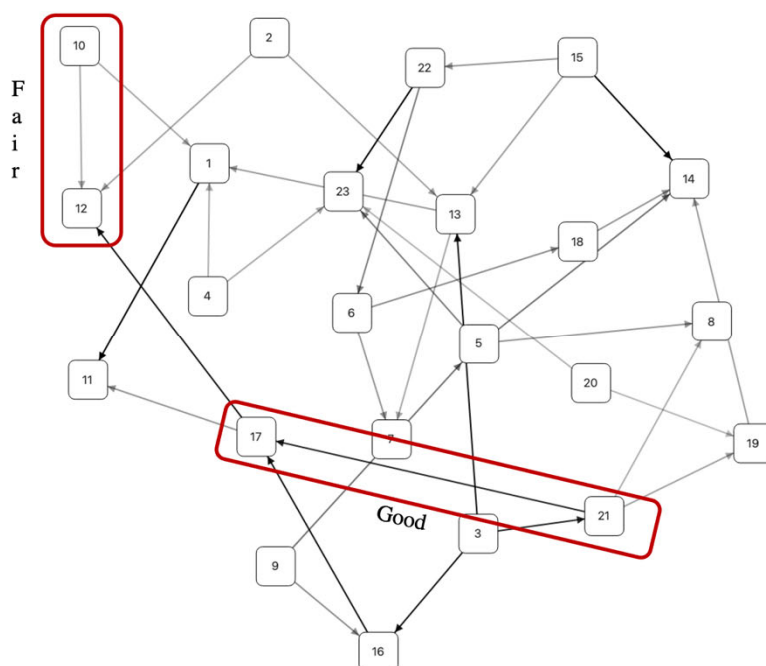

**Complex Leg – Good Convergence 21 ->17**

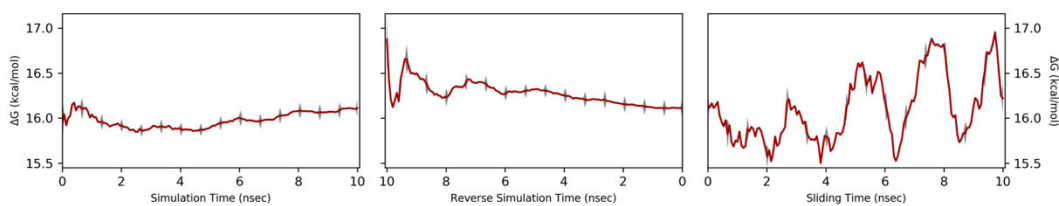

**Solvent Leg – Good Convergence 21 ->17**

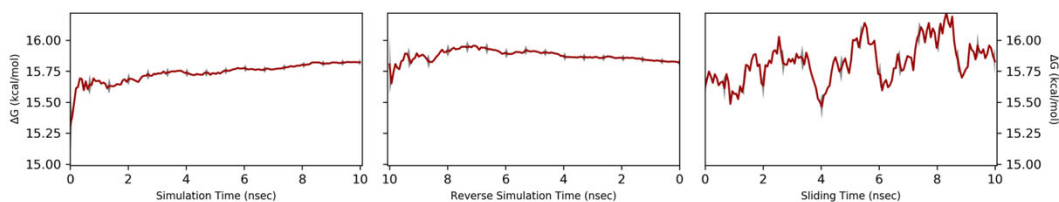

**Complex Leg – Fair Convergence 10 ->12**

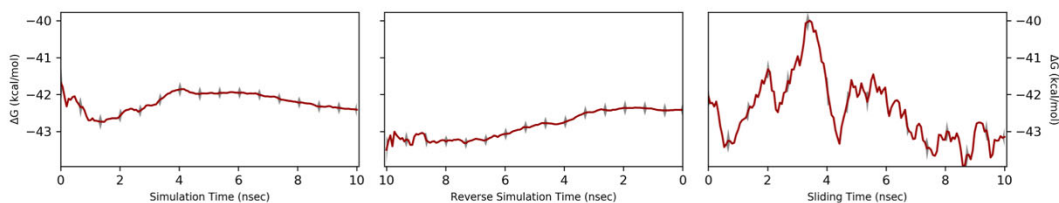

**Solvent Leg – Fair Convergence 10 ->12**

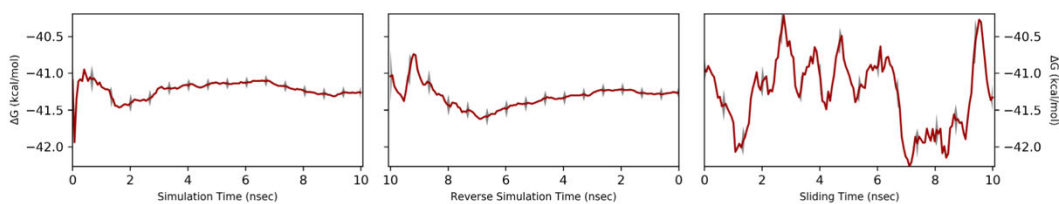



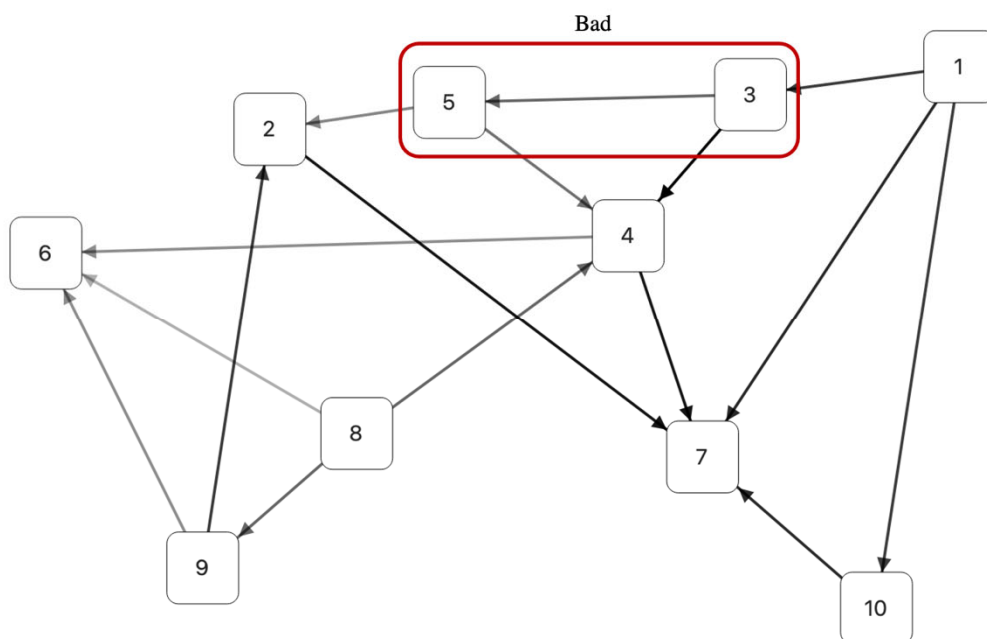

**Complex Leg – Bad Convergence 3 ->5**

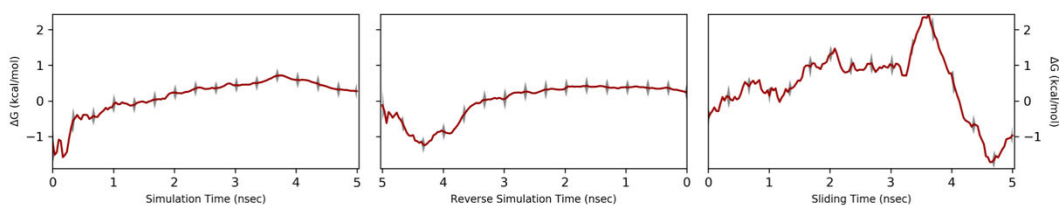

**Solvent Leg – Bad Convergence 3 ->5**

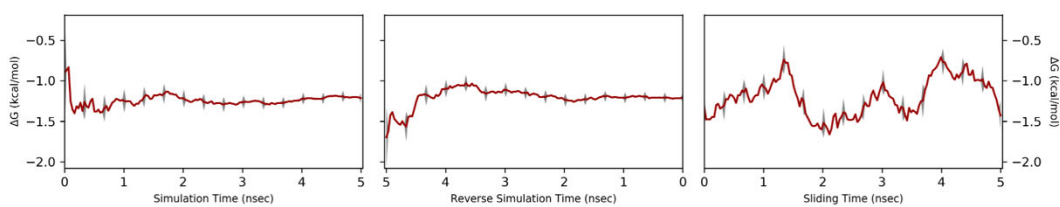

## References

1. Schrödinger Release 2021-1: Maestro, Schrödinger, LLC, New York, NY, 2021.
2. *Schrödinger Release 2019- 4: LigPrep*.
3. Blaazer, A. R.; Singh, A. K.; de Heuvel, E.; Edink, E.; Orrling, K. M.; Veerman, J. J. N.; van den Bergh, T.; Jansen, C.; Balasubramaniam, E.; Mooij, W. J.; Custers, H.; Sijm, M.; Tagoe, D. N. A.; Kalejaiye, T. D.; Munday, J. C.; Tenor, H.; Matheussen, A.; Wijtmans, M.; Siderius, M.; de Graaf, C.; Maes, L.; de Koning, H. P.; Bailey, D. S.; Sterk, G. J.; de Esch, I. J. P.; Brown, D. G.; Leurs, R., Targeting a Subpocket in Trypanosoma brucei Phosphodiesterase B1 (TbrPDEB1) Enables the Structure-Based Discovery of Selective Inhibitors with Trypanocidal Activity. *J Med Chem* **2018**, *61* (9), 3870-3888.
4. de Heuvel, E.; Singh, A. K.; Boronat, P.; Kooistra, A. J.; van der Meer, T.; Sadek, P.; Blaazer, A. R.; Shaner, N. C.; Bindels, D. S.; Caljon, G.; Maes, L.; Sterk, G. J.; Siderius, M.; Oberholzer, M.; de Esch, I. J. P.; Brown, D. G.; Leurs, R., Alkynamide phthalazinones as a new class of TbrPDEB1 inhibitors (Part 2). *Bioorg Med Chem* **2019**, *27* (18), 4013-4029.
5. Sastry, G. M.; Adzhigirey, M.; Day, T.; Annabhimoju, R.; Sherman, W., Protein and ligand preparation: parameters, protocols, and influence on virtual screening enrichments. *J Comput Aided Mol Des* **2013**, *27* (3), 221-34.
6. Schrödinger Release 2021-1: Protein Preparation Wizard; Epik, Schrödinger, LLC, New York, NY, 2021; Impact, Schrödinger, LLC, New York, NY; Prime, Schrödinger, LLC, New York, NY, 2021.
7. Schrödinger Release 2021-1: Desmond Molecular Dynamics System, D. E. Shaw Research, New York, NY, 2021. Maestro-Desmond Interoperability Tools, Schrödinger, New York, NY, 2021.
8. Schrödinger Release 2021-1: Glide, Schrödinger, LLC, New York, NY, 2021.
9. Friesner, R. A.; Murphy, R. B.; Repasky, M. P.; Frye, L. L.; Greenwood, J. R.; Halgren, T. A.; Sanschagrin, P. C.; Mainz, D. T., Extra precision glide: docking and scoring incorporating a model of hydrophobic enclosure for protein-ligand complexes. *J Med Chem* **2006**, *49* (21), 6177-96.
10. Friesner, R. A.; Banks, J. L.; Murphy, R. B.; Halgren, T. A.; Klicic, J. J.; Mainz, D. T.; Repasky, M. P.; Knoll, E. H.; Shelley, M.; Perry, J. K.; Shaw, D. E.; Francis, P.; Shenkin, P. S., Glide: a new approach for rapid, accurate docking and scoring. 1. Method and assessment of docking accuracy. *J Med Chem* **2004**, *47* (7), 1739-49.
11. Schrödinger Release 2021-1: FEP+, Schrödinger, LLC, New York, NY, 2021.
12. Harder, E.; Damm, W.; Maple, J.; Wu, C.; Reboul, M.; Xiang, J. Y.; Wang, L.; Lupyan, D.; Dahlgren, M. K.; Knight, J. L.; Kaus, J. W.; Cerutti, D. S.; Krilov, G.; Jorgensen, W. L.; Abel, R.; Friesner, R. A., OPLS3: A Force Field Providing Broad Coverage of Drug-like Small Molecules and Proteins. *J Chem Theory Comput* **2016**, *12* (1), 281-96.
13. Shivakumar, D.; Harder, E.; Damm, W.; Friesner, R. A.; Sherman, W., Improving the Prediction of Absolute Solvation Free Energies Using the Next Generation OPLS Force Field. *J Chem Theory Comput* **2012**, *8* (8), 2553-8.
14. Yu, H. S.; Deng, Y.; Wu, Y.; Sindhikara, D.; Rask, A. R.; Kimura, T.; Abel, R.; Wang, L., Accurate and Reliable Prediction of the Binding Affinities of Macrocycles to Their Protein Targets. *J Chem Theory Comput* **2017**, *13* (12), 6290-6300.
15. Kuhn, B.; Tichy, M.; Wang, L.; Robinson, S.; Martin, R. E.; Kuglstatter, A.; Benz, J.; Giroud, M.; Schirmeister, T.; Abel, R.; Diederich, F.; Hert, J., Prospective Evaluation of Free Energy Calculations for the Prioritization of Cathepsin L Inhibitors. *J Med Chem* **2017**, *60* (6), 2485-2497.
16. Abel, R.; Wang, L.; Harder, E. D.; Berne, B. J.; Friesner, R. A., Advancing Drug Discovery through Enhanced Free Energy Calculations. *Acc Chem Res* **2017**, *50* (7), 1625-1632.

17. Shivakumar, D.; Williams, J.; Wu, Y.; Damm, W.; Shelley, J.; Sherman, W., Prediction of Absolute Solvation Free Energies using Molecular Dynamics Free Energy Perturbation and the OPLS Force Field. *J Chem Theory Comput* **2010**, *6* (5), 1509-19.
18. Wang, L.; Deng, Y.; Knight, J. L.; Wu, Y.; Kim, B.; Sherman, W.; Shelley, J. C.; Lin, T.; Abel, R., Modeling Local Structural Rearrangements Using FEP/REST: Application to Relative Binding Affinity Predictions of CDK2 Inhibitors. *J Chem Theory Comput* **2013**, *9* (2), 1282-93.
